# Supplementary material
Source: publisher figshare collection journal article supplement (https://tandf.figshare.com/ndownloader/files/16700189)
Supplement: Supplementary file 1 [file 16700189]

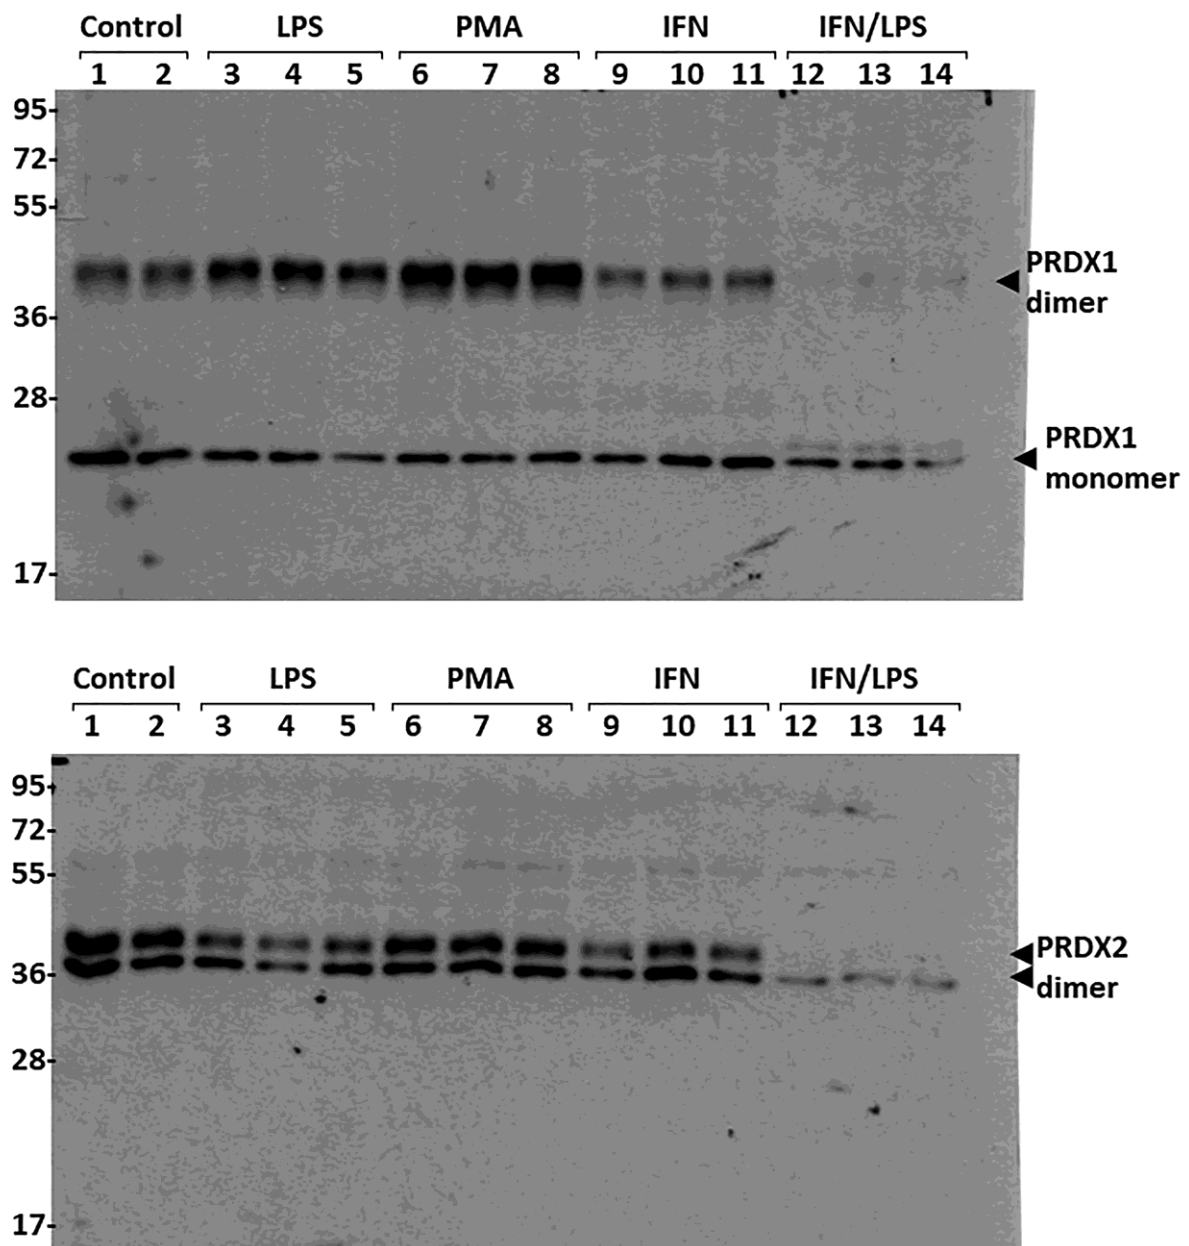

**Supplementary Fig. 1.** Western blot analysis of intracellular PRDX1 (top) and PRDX2 (bottom) protein from RAW 264.7 control cells (lanes 1-2) or cells treated for 24h with 10ng/ml LPS (lanes 3-5), 500ng/ml PMA (lanes 6-8; PMA is not relevant for the present paper but is present to avoid cutting and pasting the Western blot picture), 100U/ml IFN $\gamma$  (lanes 9-11) or 10ng/ml LPS after pre-treatment for 2h with 100U/ml IFN $\gamma$  (lanes 12-14). The two Western blots represent two different gels, not the same membrane stripped and re-probed with a different antibody.
